# Supplementary material for: Evidence for neurogenesis in the medial cortex of the leopard gecko, Eublepharis macularius
Source: PubMed Central journal article supplement (PMC6018638; doi:10.1038/s41598-018-27880-6), 2018-06-25
Supplement: 41598_2018_27880_MOESM1_ESM.pdf [file 41598_2018_27880_MOESM1_ESM.pdf]

Evidence for neurogenesis in the medial cortex of the leopard gecko, *Eublepharis macularius*

## Supplementary Information

Rebecca P McDonald<sup>1</sup> and Matthew K Vickaryous<sup>1\*</sup>

<sup>1</sup> Department of Biomedical Sciences, Ontario Veterinary College, University of Guelph,  
Guelph, Ontario, Canada

Corresponding author:

Matthew K. Vickaryous

E: [mvickary@uoguelph.ca](mailto:mvickary@uoguelph.ca)

## SUPPLEMENTARY FIGURE

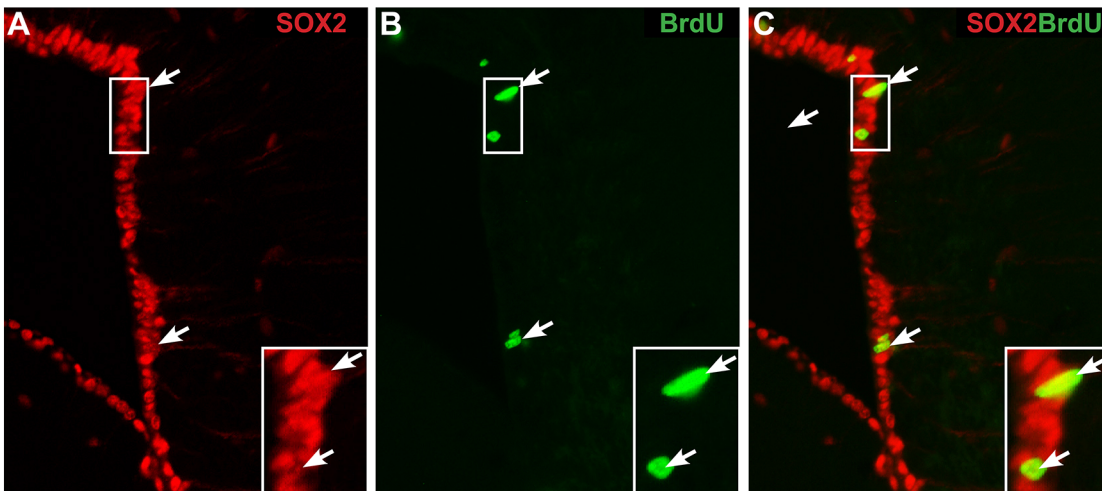

Figure S1. 5-bromo-2'-deoxyuridine (BrdU) labeled cells of the ventricular zone co-localize with SOX2. BrdU was injected intraperitoneally twice daily for two days (pulse). Geckos were collected at day 0 following the pulse. Virtually all cells of the ventricular zone express SOX2 (A). BrdU+ cells (white arrows; insets = higher magnification) were restricted to the ventricular zone at day 0 (B,C).

## SUPPLEMENTARY INFORMATION

Acute and long-duration 5-bromo-2'-deoxyuridine (BrdU) pulse-chase collection time points and experimental gecko weights.

Experiment start date: Sept. 14, 2016. All geckos were subadults at the start of the experiment, with no externally visible sex characteristics. BrdU injections given i.p., 2x daily (8am, 8pm). Short pulse = 2 day pulse; long pulse = 7 day pulse. All days counted from experimental day (d) 1 (e.g., short pulse d12 = 2d pulse, 10d chase). Injection dose= mass x 10 microlitres. All tail autotomies were performed at ~8am, immediately followed by first pulse injection. All BrdU doses for autotomized geckos were calculated following tail loss.

**Table S1.** Leopard gecko group assignments

| <b><i>Gecko ID number</i></b> | <b><i>Mass (g) at start</i></b> | <b><i>Snout to vent length (mm)</i></b> | <b><i>Tail length (mm)</i></b> | <b><i>Experimental group</i></b> |
|-------------------------------|---------------------------------|-----------------------------------------|--------------------------------|----------------------------------|
| Ap2126                        | 14.0                            | 95                                      | 70                             | Short pulse d2, original tail    |
| Ap2107                        | 15.6                            | 90                                      | 70                             | Short pulse d2, original tail    |
| Ap2113                        | 12.1                            | 90                                      | 70                             | Short pulse d2, original tail    |
| Ap2114                        | 14.3                            | 90                                      | 70                             | Short pulse d2, autotomy         |
| Ap2109                        | 13.5                            | 95                                      | 80                             | Short pulse d2, autotomy         |
| Ap2108                        | 13.2                            | 95                                      | 70                             | Short pulse d2, autotomy         |
| Ap2101                        | 15.5                            | 95                                      | 70                             | Short pulse d12,                 |

|        |      |     |    |                                      |
|--------|------|-----|----|--------------------------------------|
|        |      |     |    | original tail                        |
| Ap2104 | 13.0 | 90  | 70 | Short pulse d12, original tail       |
| Ap2110 | 14.9 | 90  | 70 | Short pulse d12, original tail       |
| Ap2124 | 14.1 | 95  | 80 | Short pulse d32, original tail       |
| Ap2119 | 13.0 | 85  | 70 | Short pulse d32, original tail       |
| Ap2117 | 15.8 | 100 | 72 | Short pulse d32, original tail       |
| Ap2129 | 13.9 | 90  | 70 | Long pulse d7, original tail         |
| Ap2130 | 14.0 | 90  | 75 | Long pulse d7, original tail         |
| Ap2112 | 15.7 | 90  | 75 | Long pulse d7, original tail         |
| Ap2123 | 14.1 | 90  | 65 | Long pulse 140d chase, original tail |
| Ap2125 | 15.9 | 90  | 68 | Long pulse 140d chase, original tail |
| Ap2128 | 13.6 | 85  | 75 | Long pulse 140d chase, original tail |

**Table S2.** Short pulse/no chase leopard gecko data

| <b>Gecko</b> | <b>Mass (g) at start</b> | <b>Mass after tail loss</b> | <b>Mass at collection</b> | <b>Experimental Group</b>     |
|--------------|--------------------------|-----------------------------|---------------------------|-------------------------------|
| Ap2126       | 14                       | n/a                         | 13.9                      | Short pulse d2, original tail |
| Ap2107       | 15.6                     | n/a                         | 16.5                      | Short pulse d2, original tail |

|        |      |      |       |                               |
|--------|------|------|-------|-------------------------------|
| Ap2113 | 12.1 | 90   | 12.7  | Short pulse d2, original tail |
| Ap2114 | 14.3 | 11.5 | 13.1  | Short pulse d2, autotomy      |
| Ap2109 | 13.5 | 11   | 11.1  | Short pulse d2, autotomy      |
| Ap2108 | 13.2 | 11.9 | *10.3 | Short pulse d2, autotomy      |

\*weight loss during experimental period but otherwise normal (bright, alert, responsive, good muscle tone)

**Table S3.** Short pulse/10-day chase leopard gecko data

| <b>Gecko</b> | <b>Mass (g) at start</b> | <b>Mass after tail loss</b> | <b>Mass at collection</b> | <b>Experimental Group</b>      |
|--------------|--------------------------|-----------------------------|---------------------------|--------------------------------|
| Ap2101       | 15.5                     | n/a                         | 16.8                      | Short pulse d12, original tail |
| Ap2104       | 13.0                     | n/a                         | 15.2                      | Short pulse d12, original tail |
| Ap2110       | 14.9                     | n/a                         | 16.2                      | Short pulse d12, original tail |

**Table S4.** Short pulse/30-day chase leopard gecko data

| <b>Gecko</b> | <b>Mass (g) at start</b> | <b>Mass after tail loss</b> | <b>Mass at collection</b> | <b>Experimental Group</b>      |
|--------------|--------------------------|-----------------------------|---------------------------|--------------------------------|
| Ap2124       | 14.1                     | n/a                         | 18.5                      | Short pulse d32, original tail |
| Ap2119       | 13.0                     | n/a                         | 17.5                      | Short pulse d32, original tail |
| Ap2117       | 15.8                     | n/a                         | 20.0                      | Short pulse d32, original tail |

**Table S5.** Cell counts comparing 5-bromo-2'-deoxyuridine (BrdU) incorporation within the ventricular zone of the medial cortex among original-tailed and tail-autotomized leopard geckos.

| GROUP | GECKO ID | SUBAREA# | SECTION# | SIDE | DAPI | BRDU |
|-------|----------|----------|----------|------|------|------|
| Og    | Ap2107   | 1        | 85       | L    | 228  | 13   |
| Og    | Ap2107   | 1        | 85       | R    | 217  | 12   |
| Og    | Ap2107   | 1        | 86       | L    | 294  | 10   |
| Og    | Ap2107   | 1        | 86       | R    | 167  | 6    |
| Og    | Ap2107   | 1        | 92       | L    | 230  | 7    |
| Og    | Ap2107   | 1        | 92       | R    | 187  | 3    |
| Og    | Ap2107   | 1        | 94       | L    | 179  | 4    |
| Og    | Ap2107   | 1        | 94       | R    | 156  | 8    |
| Og    | Ap2107   | 2        | 101      | L    | 206  | 5    |
| Og    | Ap2107   | 2        | 101      | R    | 166  | 1    |
| Og    | Ap2107   | 2        | 110      | L    | 171  | 2    |
| Og    | Ap2107   | 2        | 110      | R    | 124  | 4    |
| Og    | Ap2107   | 2        | 112      | L    | 174  | 9    |
| Og    | Ap2107   | 2        | 112      | R    | 170  | 1    |
| Og    | Ap2107   | 3        | 124      | L    | 180  | 5    |
| Og    | Ap2107   | 3        | 124      | R    | 156  | 2    |
| Og    | Ap2107   | 3        | 126      | L    | 167  | 5    |
| Og    | Ap2107   | 3        | 126      | R    | 192  | 2    |
| Og    | Ap2107   | 3        | 130      | L    | 191  | 4    |
| Og    | Ap2107   | 3        | 120      | R    | 197  | 3    |
| Og    | Ap2107   | 4        | 143      | L    | 165  | 4    |
| Og    | Ap2107   | 4        | 143      | R    | 174  | 2    |
| Og    | Ap2107   | 4        | 148      | L    | 225  | 2    |
| Og    | Ap2107   | 4        | 148      | R    | 201  | 4    |
| Og    | Ap2107   | 4        | 149      | L    | 230  | 1    |
| Og    | Ap2107   | 4        | 129      | R    | 175  | 2    |
| AU    | Ap2108   | 1        | 36       | L    | 260  | 7    |
| AU    | Ap2108   | 1        | 36       | R    | 155  | 8    |
| AU    | Ap2108   | 1        | 39       | L    | 160  | 4    |
| AU    | Ap2108   | 1        | 39       | R    | 191  | 6    |
| AU    | Ap2108   | 1        | 42       | L    | 204  | 6    |
| AU    | Ap2108   | 1        | 42       | R    | 224  | 11   |
| AU    | Ap2108   | 2        | 56       | L    | 214  | 4    |
| AU    | Ap2108   | 2        | 56       | R    | 191  | 5    |

|    |        |   |     |   |     |    |
|----|--------|---|-----|---|-----|----|
| AU | Ap2108 | 2 | 58  | L | 208 | 2  |
| AU | Ap2108 | 2 | 58  | R | 111 | 1  |
| AU | Ap2108 | 2 | 62  | L | 273 | 5  |
| AU | Ap2108 | 2 | 62  | R | 200 | 3  |
| AU | Ap2108 | 3 | 76  | L | 164 | 2  |
| AU | Ap2108 | 3 | 79  | L | 257 | 3  |
| AU | Ap2108 | 3 | 79  | R | 219 | 1  |
| AU | Ap2108 | 3 | 91  | L | 177 | 1  |
| AU | Ap2108 | 3 | 91  | R | 175 | 4  |
| AU | Ap2108 | 4 | 96  | L | 203 | 5  |
| AU | Ap2108 | 4 | 96  | R | 255 | 3  |
| AU | Ap2108 | 4 | 99  | L | 251 | 8  |
| AU | Ap2108 | 4 | 99  | R | 182 | 7  |
| AU | Ap2108 | 4 | 105 | L | 245 | 3  |
| AU | Ap2108 | 4 | 105 | R | 225 | 3  |
| AU | Ap2109 | 1 | 33  | L | 224 | 21 |
| AU | Ap2109 | 1 | 33  | R | 222 | 16 |
| AU | Ap2109 | 1 | 35  | R | 189 | 11 |
| AU | Ap2109 | 1 | 39  | L | 232 | 12 |
| AU | Ap2109 | 1 | 39  | R | 231 | 19 |
| AU | Ap2109 | 2 | 44  | L | 238 | 17 |
| AU | Ap2109 | 2 | 44  | R | 213 | 11 |
| AU | Ap2109 | 2 | 47  | L | 232 | 2  |
| AU | Ap2109 | 2 | 47  | R | 232 | 6  |
| AU | Ap2109 | 2 | 51  | L | 234 | 2  |
| AU | Ap2109 | 2 | 51  | R | 263 | 12 |
| AU | Ap2109 | 3 | 56  | L | 237 | 4  |
| AU | Ap2109 | 3 | 56  | R | 249 | 7  |
| AU | Ap2109 | 3 | 58  | L | 192 | 3  |
| AU | Ap2109 | 3 | 58  | R | 105 | 8  |
| AU | Ap2109 | 3 | 61  | L | 222 | 4  |
| AU | Ap2109 | 3 | 61  | R | 164 | 1  |
| AU | Ap2109 | 4 | 71  | L | 176 | 4  |
| AU | Ap2109 | 4 | 71  | R | 182 | 9  |
| AU | Ap2109 | 4 | 76  | L | 215 | 10 |
| AU | Ap2109 | 4 | 76  | R | 234 | 7  |
| AU | Ap2109 | 4 | 77  | L | 199 | 7  |
| AU | Ap2109 | 4 | 77  | R | 224 | 15 |
| Og | Ap2113 | 1 | 59  | L | 211 | 11 |

|    |        |   |     |   |     |    |
|----|--------|---|-----|---|-----|----|
| Og | Ap2113 | 1 | 59  | R | 241 | 17 |
| Og | Ap2113 | 1 | 62  | L | 220 | 7  |
| Og | Ap2113 | 1 | 62  | R | 146 | 3  |
| Og | Ap2113 | 1 | 66  | L | 104 | 8  |
| Og | Ap2113 | 1 | 66  | R | 245 | 16 |
| Og | Ap2113 | 2 | 73  | L | 147 | 3  |
| Og | Ap2113 | 2 | 73  | R | 180 | 10 |
| Og | Ap2113 | 2 | 76  | L | 172 | 9  |
| Og | Ap2113 | 2 | 76  | R | 156 | 7  |
| Og | Ap2113 | 2 | 79  | L | 203 | 10 |
| Og | Ap2113 | 2 | 79  | R | 155 | 2  |
| Og | Ap2113 | 3 | 86  | L | 233 | 12 |
| Og | Ap2113 | 3 | 86  | R | 211 | 7  |
| Og | Ap2113 | 3 | 89  | L | 184 | 12 |
| Og | Ap2113 | 3 | 89  | R | 189 | 10 |
| Og | Ap2113 | 3 | 92  | L | 238 | 10 |
| Og | Ap2113 | 3 | 92  | R | 184 | 1  |
| Og | Ap2113 | 4 | 104 | L | 243 | 10 |
| Og | Ap2113 | 4 | 104 | R | 219 | 9  |
| Og | Ap2113 | 4 | 107 | L | 260 | 12 |
| Og | Ap2113 | 4 | 107 | R | 127 | 2  |
| Og | Ap2113 | 4 | 110 | L | 264 | 14 |
| Og | Ap2113 | 4 | 110 | R | 139 | 5  |
| AU | Ap2114 | 1 | 19  | L | 227 | 29 |
| AU | Ap2114 | 1 | 19  | R | 180 | 19 |
| AU | Ap2114 | 1 | 22  | L | 251 | 20 |
| AU | Ap2114 | 1 | 22  | R | 205 | 26 |
| AU | Ap2114 | 1 | 25  | L | 100 | 25 |
| AU | Ap2114 | 1 | 25  | R | 170 | 22 |
| AU | Ap2114 | 2 | 33  | L | 203 | 21 |
| AU | Ap2114 | 2 | 36  | L | 177 | 28 |
| AU | Ap2114 | 2 | 36  | R | 225 | 24 |
| AU | Ap2114 | 2 | 39  | L | 224 | 6  |
| AU | Ap2114 | 2 | 39  | R | 196 | 18 |
| AU | Ap2114 | 3 | 46  | L | 194 | 13 |
| AU | Ap2114 | 3 | 46  | R | 191 | 13 |
| AU | Ap2114 | 3 | 49  | L | 185 | 6  |
| AU | Ap2114 | 3 | 49  | L | 190 | 14 |
| AU | Ap2114 | 3 | 52  | R | 215 | 18 |



|    |        |   |     |   |     |    |
|----|--------|---|-----|---|-----|----|
| AU | Ap2114 | 4 | 62  | L | 194 | 17 |
| AU | Ap2114 | 4 | 62  | R | 201 | 22 |
| AU | Ap2114 | 4 | 64  | L | 265 | 20 |
| AU | Ap2114 | 4 | 64  | R | 217 | 10 |
| AU | Ap2114 | 4 | 67  | L | 222 | 15 |
| AU | Ap2114 | 4 | 67  | R | 203 | 6  |
| Og | Ap2126 | 1 | 168 | L | 187 | 3  |
| Og | Ap2126 | 1 | 168 | R | 196 | 5  |
| Og | Ap2126 | 1 | 171 | L | 249 | 14 |
| Og | Ap2126 | 1 | 171 | R | 186 | 10 |
| Og | Ap2126 | 1 | 174 | L | 206 | 9  |
| Og | Ap2126 | 1 | 174 | R | 166 | 14 |
| Og | Ap2126 | 2 | 148 | R | 183 | 3  |
| Og | Ap2126 | 2 | 151 | L | 124 | 8  |
| Og | Ap2126 | 2 | 151 | R | 149 | 5  |
| Og | Ap2126 | 2 | 154 | L | 204 | 10 |
| Og | Ap2126 | 2 | 154 | R | 199 | 15 |
| Og | Ap2126 | 3 | 128 | L | 190 | 0  |
| Og | Ap2126 | 3 | 128 | R | 173 | 3  |
| Og | Ap2126 | 3 | 132 | L | 200 | 1  |
| Og | Ap2126 | 3 | 132 | R | 190 | 4  |
| Og | Ap2126 | 3 | 134 | L | 159 | 5  |
| Og | Ap2126 | 3 | 134 | R | 191 | 4  |
| Og | Ap2126 | 4 | 106 | L | 155 | 6  |
| Og | Ap2126 | 4 | 106 | L | 198 | 3  |
| Og | Ap2126 | 4 | 109 | L | 145 | 0  |
| Og | Ap2126 | 4 | 109 | R | 174 | 3  |
| Og | Ap2126 | 4 | 112 | R | 169 | 6  |

Au, autotomized tail; DAPI, 4',6-diamindino-2-pheylindole; L, left medial cortex; Og, original tail, R, right medial cortex

**Table S6.** Long pulse/no chase leopard gecko data

| <b>Gecko</b> | <b>Mass (g) at start</b> | <b>Mass after tail loss</b> | <b>Mass at collection</b> | <b>Experimental Group</b>    |
|--------------|--------------------------|-----------------------------|---------------------------|------------------------------|
| Ap2129       | 13.9                     | n/a                         | 15.3 (male)               | Long pulse d7, original tail |
| Ap2130       | 14.0                     | n/a                         | 15.2 (female)             | Long pulse d7, original tail |
| Ap2112       | 15.7                     | n/a                         | 16.6 (male)               | Long pulse d7, original tail |

**Table S7.** Long pulse/20 week chase leopard gecko data

| <b>Gecko</b> | <b>Mass (g) at start</b> | <b>Mass after tail loss</b> | <b>Mass (g) at collection</b> | <b>Experimental Group</b>            |
|--------------|--------------------------|-----------------------------|-------------------------------|--------------------------------------|
| Ap2123       | 14.1                     | n/a                         | 26.5                          | Long pulse 140d chase, original tail |
| Ap2125       | 15.9                     | n/a                         | Deceased Oct.4                | Long pulse 140d chase, original tail |
| Ap2128       | 13.6                     | n/a                         | 25.5                          | Long pulse 140d chase, original tail |
| Ap2106*      | 24.8                     | n/a                         | 32.1                          | Long pulse 140d chase, original tail |

\* Replacement for Ap21-25, collected Mar. 16, 2017

## **File S1**

### **Hematoxylin and Eosin Protocol**

Slide-mounted sections were deparaffinized and rehydrated to deionized to water through xylene (3 washes; 2 minutes), absolute isopropanol (3 washes; 2 minutes), 70% isopropanol (2 minutes) and deionized water (dH<sub>2</sub>O) (2 minutes). Sections were stained with modified Harris hematoxylin for 10 minutes (Fischer Scientific, Waltham, Massachusetts, USA), and then rinsed with deionized water before being dipped (5 times) in acid alcohol (1% hydrochloric acid in 70% isopropanol). Sections were then rinsed again in deionized water, blued in ammonia water (~10 seconds), followed by a rinse in running water. Next, sections were dipped 6 times in 70% isopropanol before being stained in eosin (1 minute). Sections were passed through four changes of 100% isopropanol (2 minutes each), cleared in three changes of xylene (2 minutes each), and then coverslipped using Cytoseal (Fischer Scientific, Waltham, Massachusetts, USA).

### **Immunofluorescence Protocols**

Sections were de-paraffinized and rehydrated to water through xylene (3 washes; 2 minutes), absolute isopropanol (3 washes; 2 minutes), 70% isopropanol (2 minutes) and deionized water (dH<sub>2</sub>O) (2 minutes). Sections were then rinsed for 15 minutes in 1X phosphate buffered saline (PBS), and subject to one of two antigen retrieval methods: sections stained with SOX2/Musashi-1 or SOX2/HuCD were incubated for 30 minutes in 2N hydrochloric acid at 37 °C; all other sections were submerged in citrate buffer at 95 °C for 12 minutes, and then cooled for 20 minutes. Following antigen retrieval, all

sections were rinsed for 2 minutes in 1X PBS. Sections were then incubated for 20 minutes in 0.1% trypsin at 37°C (Sigma-Aldrich, St. Louis, Missouri, USA), rinsed for 2 minutes in 1X PBS and then blocked for 30 minutes at 37 °C in 5% normal goat serum in diluent (1% bovine serum albumin, 0.5% Tween 20, 0.1% sodium azide in 1X PBS). Next, sections were incubated overnight at 4°C in primary antibody diluted in diluent (SOX2 [1:50] Cell-Signalling, Whitby, Ontario, Canada; GFAP [1:400] DAKO, Glostrup, Denmark; Vimentin [1:50] Developmental Studies Hybridoma Bank, Iowa City, Iowa, USA; HuC/D [1:10] Molecular Probes, Rockford, Illinois, USA; BrdU [1:200] Developmental Studies Hybridoma Bank, Iowa City, Iowa, USA; tomato lectin [1:50] Sigma-Aldrich, St. Louis, Missouri, USA; NeuN [1:125] Abcam, Cambridge, Massachusetts, USA). One section per slide served as an omission control and was incubated in diluent only. Slides were then rinsed in 1X PBS (3 washes; 2 minutes), and incubated in secondary antibody at room temperature for 1 hour. Slides were rinsed in 1X PBS (3 washes; 2 minutes), and then stained with nuclear marker DAPI ([1:5000] Life Technologies, Eugene, Oregon, USA) (2 minutes). Once more, slides were rinsed in 1X PBS (3 washes; 2 minutes), and then cover slipped with fluorescent mounting media (DAKO, Glostrup, Denmark).

To detect PCNA, pHH3, FGF2, VEGF, VEGFR1 and VEGFR2, we used an abbreviated protocol. As for the Standard Protocol, sections were de-paraffinized and brought to water. Sections then underwent heat-induced antigen retrieval by submersion in citrate buffer at 95°C for 12 minutes, and were subsequently cooled for 20 minutes. Following antigen retrieval sections were rinsed in phosphate buffered saline (PBS). They were then blocked for one hour in 5% normal goat serum (NGS) in

sterile PBS at room temperature. Primary antibodies were diluted in sterile PBS and applied to one section on the slide for overnight incubation at 4°C (pHH3 [1:100] Cell Signaling, Whitby, Ontario, Canada; PCNA [1:100], FGF2 [1:100], VEGF [1:50], VEGFR1 [1:50], VEGFR2 [1:100] Santa-Cruz Biotechnology, Dallas, Texas, USA). Sections were rinsed in PBS (3 washes; 2 minutes) and then incubated in secondary antibody for one hour at room temperature. As for the Standard Protocol, slides were then rinsed with PBS, counterstained using DAPI, rinsed with PBS (3 washes; 2 minutes) and cover slipped using fluorescent mounting media (DAKO, Glostrup, Denmark).

### **Immunohistochemistry Protocol**

Immunohistochemistry was additionally used to visualize pHH3. Sections were deparaffinized and rehydrated to water as above, quenched for 20 minutes in 3% hydrogen peroxide diluted in deionized water, and rinsed with PBS (3 washes; 2 minutes). Sections underwent heat-induced antigen retrieval by submersion in citrate buffer (see above), prior to rinsing with PBS. They were then blocked for one hour in 3% normal goat serum (NGS) in sterile PBS at room temperature. pHH3 [1:500] was diluted in sterile PBS and applied to one section on the slide for overnight incubation at 4°C. Sections were rinsed in PBS and incubated in secondary antibody for one hour at room temperature (Biotinylated Goat anti-Rabbit [1:500] Jackson Immuno Research Laboratories). Following subsequent PBS rinsing, sections were incubated with horseradish peroxidase conjugated streptavidin (Jackson ImmunoResearch Laboratories, Inc. West Grove, Pennsylvania, USA) diluted in sterile PBS (one hour; room temperature). Sections were rinsed in PBS and then 3,3'-diaminobenzidine

peroxidase substrate (DAB; Vector Laboratories, Burlingame, California, USA) was applied for 35 seconds, before the chromogenic reaction was stopped by immersion in deionized water. Sections were counterstained with Mayer's hematoxylin (1 minute), rinsed in deionized water, blued in ammonia water, and rinsed again in deionized water. Slides were then dehydrated through three changes of 100% isopropanol (2 minutes each), cleared in three changes of xylene (2 minutes each), and coverslipped using Cytoseal.
